# Supplementary material
Source: PubMed Central journal article supplement (PMC2720778)
Supplement: afn227_1.pdf [file afn227_1.pdf]

Appendix Figure 1. Flow of Subjects in Study.

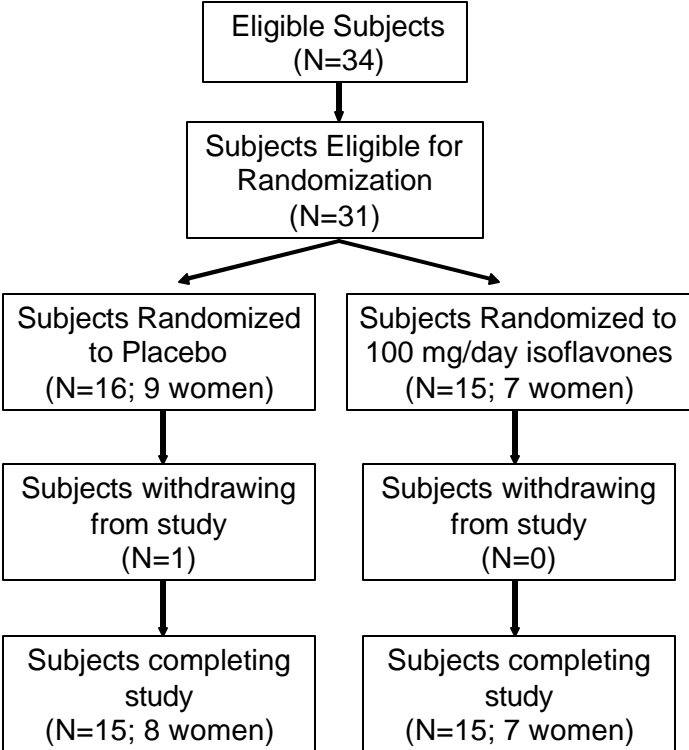

**Appendix Table 1.** Quality control analysis of Novasoy® and matching placebo tablets (1.A.), and tablet formulation and ingredient grade information (1.B.) information provided by Archer Daniels Midland Company, James R. Randall Research Center, Decatur, IL.

**Table 1.A.** Quality Control Analysis of Novasoy® Tablets\* supplied by ADM

| Sample | Daidzin | Glycitin | Genistin | Malonyl Daidzin | Malonyl Glycitin | Acetyl Daidzin | Acetyl Glycitin | Malonyl Genistin | Daidzein | Glycetein | Acetyl Genistin | Genistein | TOTAL |
|--------|---------|----------|----------|-----------------|------------------|----------------|-----------------|------------------|----------|-----------|-----------------|-----------|-------|
| Active | 18.6    | 4.4      | 21.7     | 0.1             | 0.1              | 0.5            | 0.1             | 0.0              | 0.4      | 0.3       | 0.6             | 0.2       | 47.2  |

**Table 1.B.** Tablet formulation and ingredient grade information

| Active Tables                 | Grade*  | Placebo Tablets             | Grade*  |
|-------------------------------|---------|-----------------------------|---------|
| 109 mg Novasoy (Lot# 0210071) | Food    | 93 mg maltodextrin 10-DE    | Food    |
|                               |         | 10 mg caramel color         | Food    |
| 60 mg sorbitol                | NF/FCC  | 60 mg sorbitol              | NF/FCC  |
| 3 mg magnesium stearate       | USP/NF  | 3 mg magnesium stearate     | USP/NF  |
| 428 mg dicalcium phosphate    | USP/FCC | 434 mg dicalcium phosphate  | USP/FCC |
| <b>Total: 600 mg tablet</b>   |         | <b>Total: 600 mg tablet</b> |         |

\*Reagent chemicals meet or surpass specifications of the United States Pharmacopoeia (USP), the National Formulary (NF), and/or the Food Chemicals Codex (FCC).

Soy isoflavones in older adults

**Appendix Table 2.** Citations for tests discussed in text.

| Test                                      | Citation                                                                                                                                                                                                                                        |
|-------------------------------------------|-------------------------------------------------------------------------------------------------------------------------------------------------------------------------------------------------------------------------------------------------|
| Buschke Selective Reminding test          | Buschke, H. and P.A. Fuld, <i>Evaluating storage, retention, and retrieval in disordered memory and learning</i> . Neurology, 1974. <b>24</b> (11): p. 1019-25.                                                                                 |
| Rey Complex Figure test – Copy and Recall | Corwin, J. and F. Bylsma, <i>Translations of excerpts from Andre Rey's Psychological examination of traumatic encephalopathy and P.A. Osterrieth's The Complex Figure Copy Test</i> . The Clinical Neuropsychologist, 1993. <b>7</b> : p. 3-15. |
| Visual Spatial Learning Test              | Malec, J., et al., <i>Visual spatial learning test: Normative data and further validation</i> . Psychol Assess, 1997. <b>4</b> (4): p. 433-441.                                                                                                 |
| Boston Naming test                        | Kaplan, E., H. Goodglass, and S. Brand, <i>Boston naming test</i> . 1983, Philadelphia: Lea & Febiger. 4 , 60 leaves of plates.                                                                                                                 |
| FAS/Animal fluency                        | Benton, A. and K. Hamsher, <i>Multilingual Aphasia Examination</i> . 1989, Iowa City, IA: AJA Associates.                                                                                                                                       |
| Grooved Peg Board                         | Kløve, H., ed. <i>Clinical neuropsychology</i> . The medical clinics of North America., ed. F.M. Forster. 1963, Saunders: New York.                                                                                                             |
| Stroop Color Word test                    | Golden, C., <i>The Stroop Color and Word Test: A manual for clinical and experimental uses</i> . 1978, Chicago: Stoetling.                                                                                                                      |
| Mazes                                     | Wechsler, D., <i>Wechsler Intelligence Scale for Children WISC-III</i> . 3rd ed. 1991, San Antonio, TX: Psychological Corporation.                                                                                                              |
| Trailmaking Test B                        | Spreen, O. and E. Strauss, <i>A compendium of neuropsychological tests</i> . 2nd ed. 1998, New York: Oxford University Press.                                                                                                                   |
